# Supplementary material for: Expression of Nectin-4 and PD-L1 in Upper Tract Urothelial Carcinoma
Source: MDPI journal article supplement (doi:10.3390/ijms21155390), 2020-07-29
Supplement: s1 [file s1]

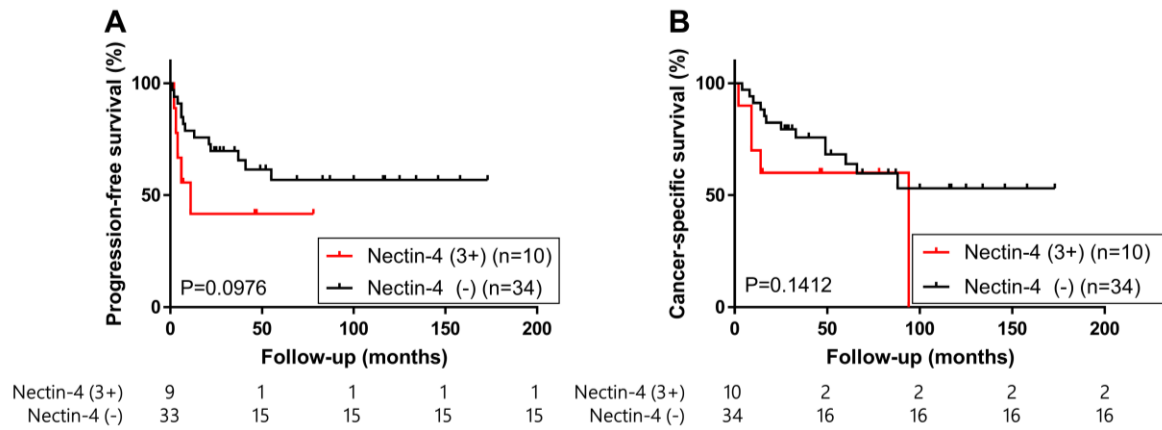

**Supplementary Figure S1** Progression-free survival (A) and cancer-specific survival (B) in 99 patients with upper tract urothelial carcinoma (UTUC) based on Nectin-4 expression (0 versus 3+).

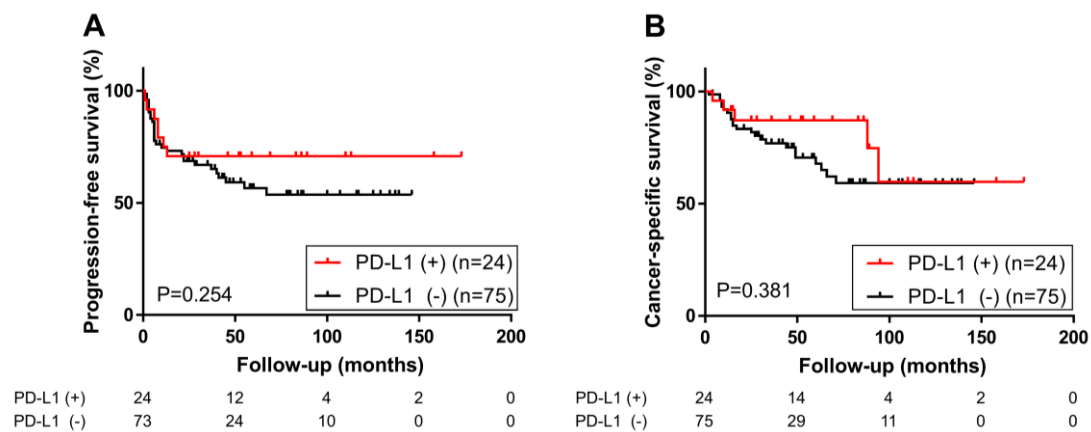

**Supplementary Figure S2** Progression-free survival (A) and cancer-specific survival (B) in 99 patients with upper tract urothelial carcinoma (UTUC) based on Programmed Death Ligand 1 (PD-L1) expression.
